# Supplementary material for: Underestimating Calorie Content When Healthy Foods Are Present: An Averaging Effect or a Reference-Dependent Anchoring Effect?
Source: PLOS journal article supplement (doi:10.1371/journal.pone.0071475), 2013-08-14
Supplement: S1 (10.1371/journal.pone.0071475.s001) [file journal.pone.0071475.s001]

A

No side

Red side

Green side

Burger

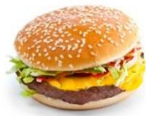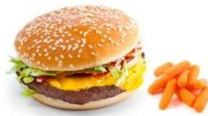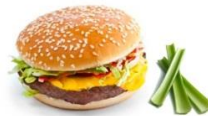

Lasagna

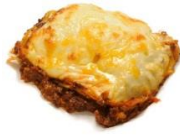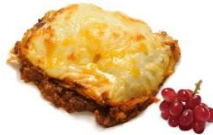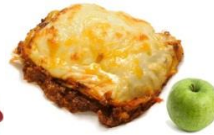

B

Main alone

Small side

Large side

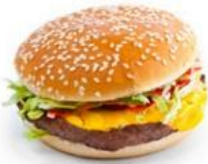

Healthy side

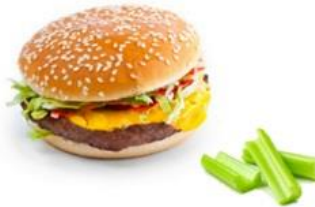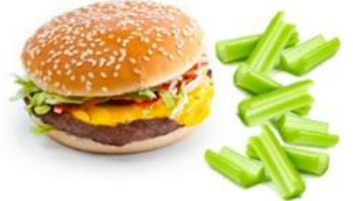

Unhealthy side

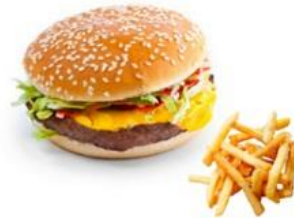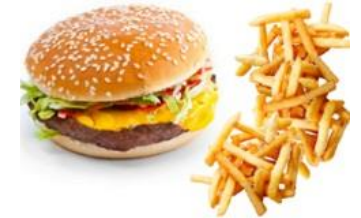

C

Main only reference

Main + healthy side reference

500 kcal (calories)

500 kcal (calories)

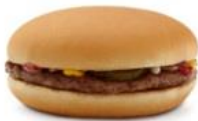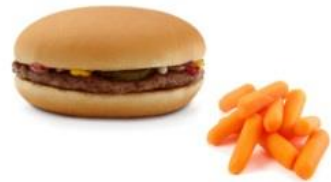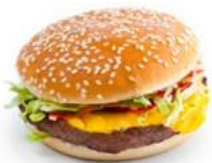

Group 1

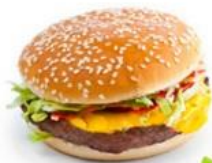

Group 2

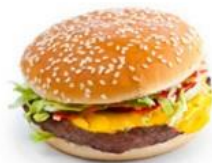

Group 3

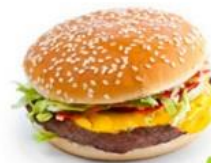

Group 4
